# Supplementary material for: Tailor-made synthesis of an melamine-based aminal hydrophobic polymer for selective adsorption of toxic organic pollutants: an initiative towards wastewater purification
Source: Royal Society of Chemistry journal article supplement (doi:10.1039/c9ra00453j), 2019-01-01
Supplement: c9ra00453j3.pdf [file c9ra00453j3.pdf]

## Supporting Information

Tailor-made synthesis of an aminated based hydrophobic polymer for selective adsorption of toxic organic pollutants: an initiative towards waste water purification

Debanjan Dey,<sup>[a,b]</sup> Naresh Chandra Murmu,<sup>[a,b]</sup> and Priyabrata Banerjee\*<sup>[a,b]</sup>

---

- a. *Surface Engineering & Tribology Group, CSIR-Central Mechanical Engineering Research Institute, Mahatma Gandhi Avenue, Durgapur 713209, India*  
**E-mail:** [pr\\_banerjee@cmeri.res.in](mailto:pr_banerjee@cmeri.res.in), [priyabrata\\_banerjee@yahoo.co.in](mailto:priyabrata_banerjee@yahoo.co.in)  
**Web:** <http://www.cmeri.res.in> and [www.priyabratabanerjee.in](http://www.priyabratabanerjee.in)  
Contact number: (+91) 9433814081
- b. *Academy of Scientific & Innovative Research (AcSIR) at CSIR-CMERI, Mahatma Gandhi Avenue, Durgapur 713209, India*
-

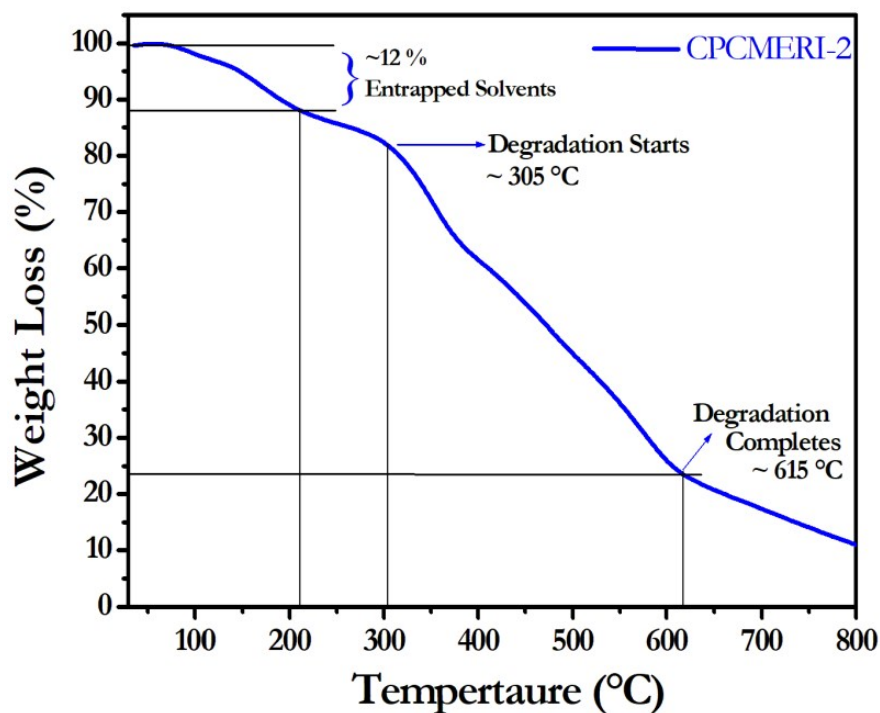

**Fig. S1** TGA of CPCMERI-2 under N<sub>2</sub> atmosphere (N<sub>2</sub> Flow rate 20.0 ml/min and Heating rate: 20.00°C/min).

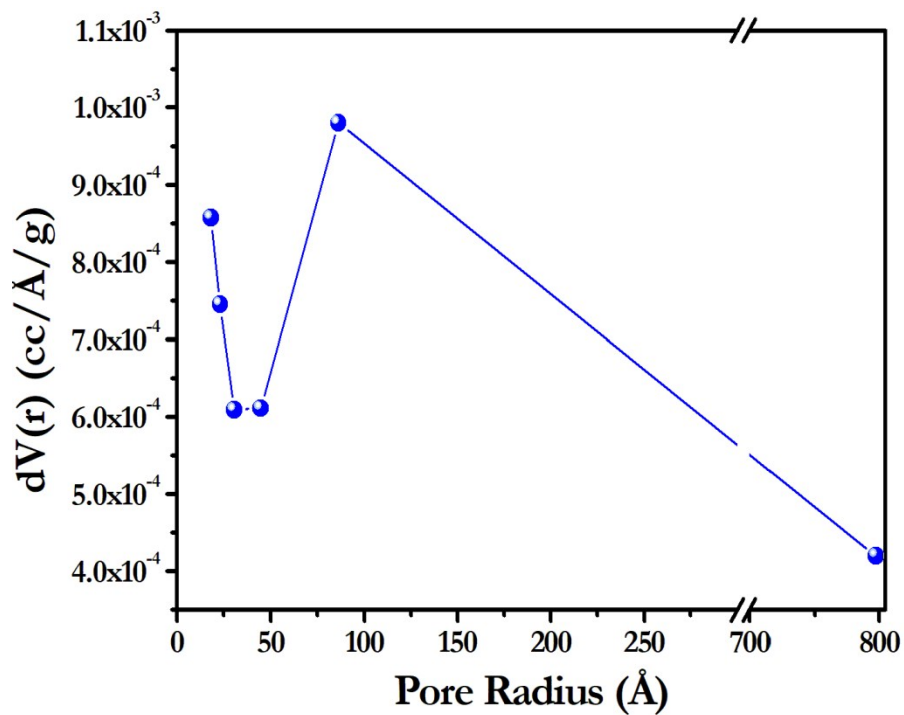

**Fig.S2** Pore size distribution of CPCMERI-2 by BJH method considering the adsorption model.

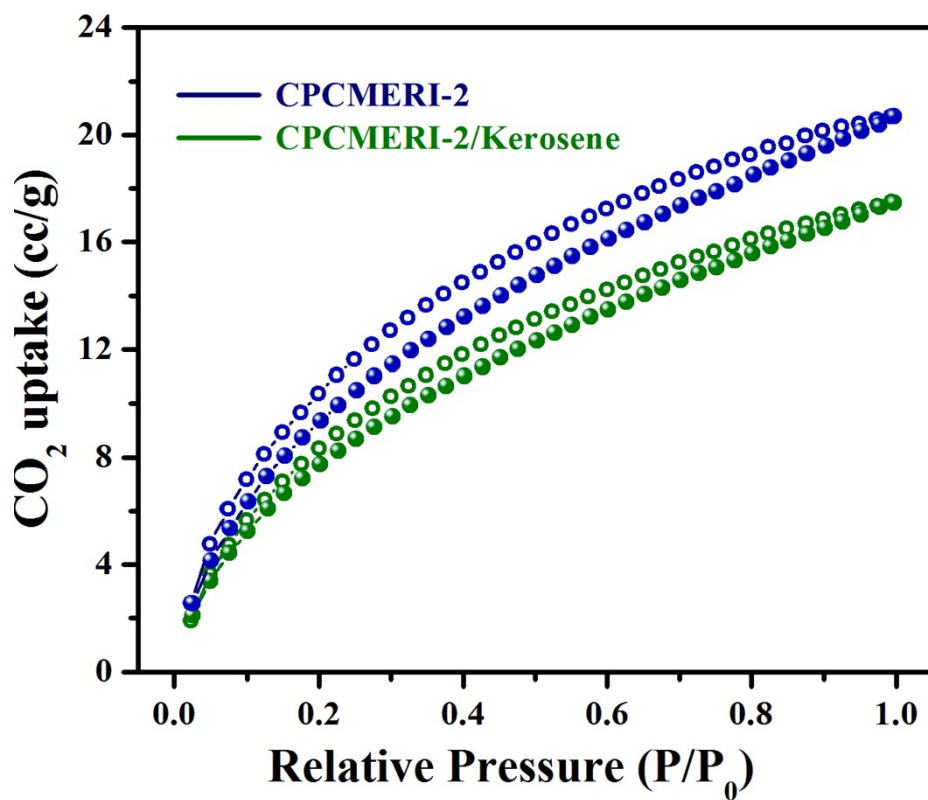

**Fig. S3:** Comparative CO<sub>2</sub> adsorption isotherm of CPCMERI-2 before and after kerosene adsorption at 298K (Filled Circle: Adsorption; Blank Circle: Desorption).

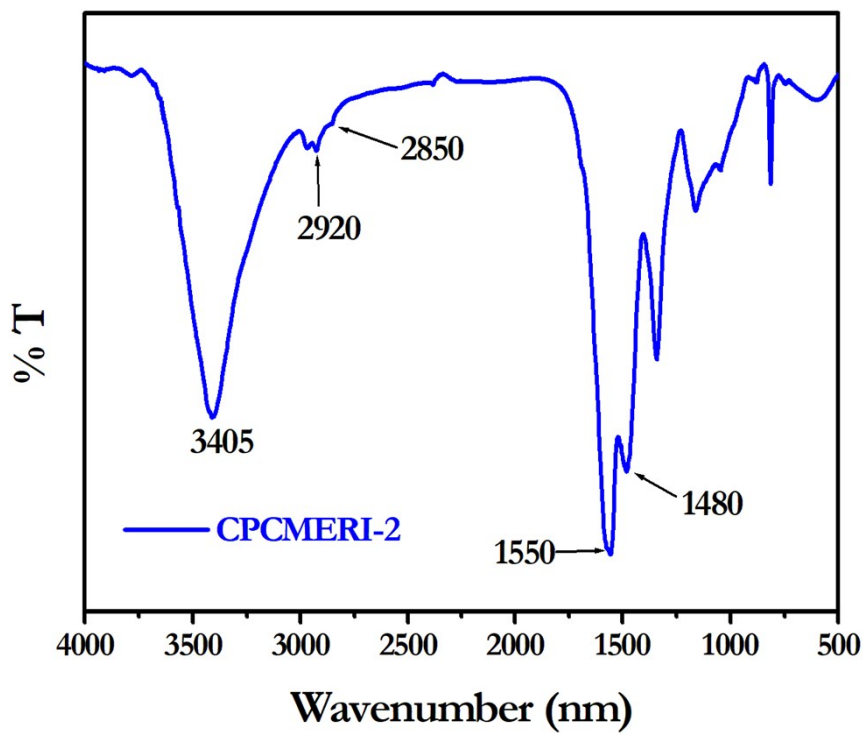

**Fig. S4** FT-IR spectrum of CPCMERI-2 after 4 times recycling study of kerosene uptake showing the robustness of the polymer.
